# Supplementary material for: End‐Point Static Control of Basic Oxygen Furnace (BOF) Steelmaking Based on Wavelet Transform Weighted Twin Support Vector Regression
Source: Hindawi journal article supplement (doi:10.1155/2019/7408725), 2019-01-01
Supplement: f1 [file 7408725.f1.xls]

## Sheet: 查询1
Initial Carbon content，%	Initial temperature，℃	Weight of hot metal，ton	SI content %	MN content %	P content %	S content %	Endpoint Carbon content	Endpoint Temperature	Oxygen Volume，Nm3	Total Weight of auxiliary raw materials,ton	Light calcined dolomite，ton	Dolomite raw stone,ton	Lime，ton	Grey ball, ton	Ore, ton	Waste steel, ton
4.625	1364	250.15	0.47832	0.17085	0.0408	0.00222	0.03929	1682	13817	54.81	3.01	3.86	6.24	0.92	4.96	35.82
4.599	1382	239.07	0.44761	0.13202	0.05912	0.0036	0.04324	1687	13700	67.54	2.77	3.86	5.83	3.02	2.49	49.57
4.563	1333	262.02	0.37211	0.17256	0.0945	0.00258	0.037	1682	13751	53.19	3.49	2.64	6.99	0.36	5.08	34.63
4.412	1304	262.57	0.4674	0.1811	0.10867	0.0037	0.0376	1682	14059	50.37	4.05	3.99	7.02	0.04	2.28	32.99
4.477	1303	254.94	0.26995	0.12144	0.10096	0.00209	0.0361	1682	14567	52.39	3.47	1.02	5.2	1.99	0.85	39.86
4.421	1345	254.74	0.47097	0.09438	0.13043	0.00424	0.038	1677	14275	58.03	4.96	1.93	5.37	2.99	4.44	38.34
4.378	1255	260.21	0.28412	0.1635	0.09928	0.00349	0.0448	1683	13990	44.2	3.59	1.99	6.97	0.03	1.56	30.06
4.575	1343	256.44	0.18995	0.1368	0.11231	0.00317	0.0423	1688	13957	47.98	3.56	2.3	8.03	0.11	1.42	32.56
4.433	1264	253.73	0.18064	0.11794	0.0923	0.00183	0.04	1683	14008	43.63	4.07	2.12	6.51	0.01	0.98	29.94
4.797	1365	254.58	0.42433	0.12962	0.09708	0.0041	0.03706	1683	13551	68.06	3.48	3.33	7.49	0.35	3.43	49.98
4.626	1346	243.38	0.31652	0.13644	0.13854	0.00181	0.0377	1683	13582	60.77	3.99	3.07	6.02	1.14	0.76	45.79
4.594	1342	245.47	0.41326	0.2079	0.07554	0.00356	0.0375	1678	14009	62.98	4.3	2.88	6.69	1.99	1.58	45.54
4.453	1271	253.76	0.15204	0.14529	0.12622	0.00396	0.039	1678	13495	43.28	3.05	1.13	5.65	2.96	0.79	29.7
4.515	1325	256.18	0.42079	0.13058	0.0912	0.00337	0.0352	1683	14009	60.27	3.69	3.31	5.93	2.16	1.1	44.08
4.499	1332	259.98	0.15617	0.1337	0.09594	0.0054	0.036	1683	13934	48.01	2.49	1.96	5.65	1.99	1.71	34.21
4.465	1331	255.75	0.42822	0.132	0.10068	0.00501	0.04071	1678	13502	55.57	2.98	2.24	5.01	2.96	1.92	40.46
4.52	1346	245.2	0.52141	0.13578	0.09175	0.00236	0.0378	1673	13630	61.1	5.19	2.01	5.48	3.01	2.5	42.91
4.527	1339	252.13	0.43383	0.17572	0.10474	0.00283	0.039	1683	14035	59.26	2.53	4.09	7.55	0.19	2.46	42.44
4.559	1319	245.18	0.15435	0.15432	0.09328	0.00227	0.0363	1683	13130	49.65	3.01	1.99	5	2.99	0.32	36.34
4.521	1336	258.97	0.37774	0.13951	0.10281	0.00402	0.03711	1678	13788	56.68	4.03	1.7	6.5	0.94	2.97	40.54
4.708	1349	260.22	0.33441	0.09011	0.09014	0.00292	0.042	1678	13311	50.78	3	2.51	6.63	0.06	4.13	34.45
4.328	1307	250.44	0.40012	0.1236	0.1208	0.00264	0.04386	1688	13899	48.36	2.48	2.73	6.05	3	4.46	29.64
4.615	1346	247.79	0.42733	0.11757	0.0761	0.00218	0.03952	1683	13641	60.39	2.82	3.4	5.93	1.9	2.57	43.77
4.7455	1351	242.4	0.35905	0.157	0.0994	0.00191	0.0408	1678	14174	62.08	3.97	1.14	4.57	2.95	4.17	45.28
4.713	1330	241.9	0.31485	0.12425	0.09056	0.00851	0.03623	1679	13126	58.45	3.31	1.84	4.78	2.49	1.42	44.61
4.8365	1359	244.64	0.40134	0.17489	0.10746	0.00319	0.0429	1679	12513	56.66	3.3	1.93	4.19	2.95	2.48	41.81
4.453	1346	242.71	0.39226	0.19479	0.08305	0.00441	0.0421	1679	13215	60.41	3.49	2.98	6	2.98	2.32	42.64
4.545	1359	251.84	0.36346	0.10985	0.11873	0.00273	0.0429	1689	12984	53.3	2.68	1.73	5.47	2.88	5.75	34.79
4.616	1359	255.47	0.255	0.15807	0.10317	0.00233	0.0437	1684	13967	51.98	3.16	2	4.39	3	6.01	33.42
4.427	1292	260.35	0.29553	0.17418	0.10501	0.00223	0.0388	1679	13326	52.13	4.04	3.42	5.96	2.01	1.02	35.68
4.46	1230	253.05	0.33972	0.24999	0.11016	0.00843	0.03967	1679	14109	43.66	4.15	2.33	7.16	0.02	0.96	29.04
4.734	1360	242.1	0.35824	0.1213	0.09821	0.00266	0.04417	1684	13362	62.93	2.99	2.22	5.93	2.79	1.62	47.38
4.497	1320	238.59	0.28059	0.14445	0.09595	0.00679	0.043	1679	14308	54.79	3.23	2.07	6.8	1.19	1.22	40.28
4.84	1342	254.66	0.29262	0.18531	0.0902	0.00589	0.036	1689	13543	53.3	4.05	3.06	6.23	2	0.5	37.46
4.625	1335	240.67	0.42565	0.18773	0.12	0.00286	0.044	1689	13994	59.04	3.4	2.26	4.95	2.51	2.87	43.05
4.55	1338	252.74	0.33186	0.11806	0.11778	0.00468	0.043	1684	13060	53.42	2.5	3.41	4.88	1.9	0.95	39.78
4.613	1328	260.55	0.24905	0.14123	0.10397	0.00339	0.0384	1679	14049	48.88	4.01	2.05	6.45	0.05	4	32.32
4.578	1360	243.87	0.38402	0.09696	0.10724	0.00366	0.04237	1679	13346	56.84	2.52	3.54	4.96	2.99	2.42	40.41
4.434	1319	257.7	0.26167	0.15646	0.091	0.00633	0.041	1679	13692	50.75	2.99	1.42	5.71	2.9	2.85	34.88
4.581	1314	249.3	0.21569	0.1338	0.11096	0.00235	0.04127	1679	13637	57.62	3.83	1.1	6.71	0.52	0.66	44.8
4.432	1320	262.9	0.29456	0.15088	0.10088	0.00381	0.0388	1684	14814	50.96	4.06	3.5	5.31	2.97	0.81	34.31
4.491	1301	258.59	0.32678	0.12564	0.09981	0.00454	0.038	1684	14030	52.51	2.75	2.18	6.42	1.9	3.54	35.72
4.472	1336	249.48	0.23587	0.17381	0.09535	0.00355	0.0361	1684	13372	54.76	3.25	2.04	4.96	3.02	0.63	40.86
4.609	1357	256.36	0.42786	0.20157	0.11246	0.00301	0.039	1674	14352	59.94	3.8	1.99	5.9	1.98	3.44	42.83
4.506	1275	260.25	0.24307	0.18276	0.07741	0.0017	0.0401	1679	13890	47.29	3.56	2.88	7.29	0.09	0.68	32.79
4.6	1309	265.01	0.2822	0.18849	0.08863	0.00441	0.0386	1684	14166	38.85	3	1.98	6.02	2.99	3.99	20.87
5.127	1375	248.27	0.37619	0.20809	0.10562	0.00252	0.0372	1689	14365	56.42	4.02	2.1	5.51	1.72	5.04	38.03
4.551	1389	252.75	0.45541	0.13753	0.07519	0.0032	0.0352	1679	13882	55.31	4.71	2.09	5.51	0.27	4.85	37.88
4.527	1339	259.52	0.49009	0.15938	0.07083	0.00401	0.045	1689	14515	58.36	4.74	2.01	7.07	0.13	6.9	37.51
4.552	1309	258	0.35447	0.16286	0.12286	0.00655	0.045	1685	13669	55.53	3.84	2.16	4.82	2.91	1.04	40.76
5.22	1362	254.59	0.3492	0.15795	0.10712	0.00314	0.0353	1685	13742	58.62	3.6	2.01	6.97	2.97	1	42.07
4.479	1340	247.17	0.39349	0.13795	0.08707	0.00291	0.04182	1680	13341	59.46	3.24	2.19	5.84	2.97	1.07	44.15
4.298	1344	255.37	0.21359	0.08882	0.10745	0.00329	0.044	1689	13727	49.17	3.15	2.05	4.8	3.11	1.45	34.61
4.527	1298	253.19	0.33517	0.11556	0.12298	0.00132	0.04486	1684	13411	50.1	3.64	1.05	5.99	2.92	1.98	34.52
5.186	1329	254.46	0.28571	0.22455	0.09666	0.00274	0.0447	1684	14070	56.31	3.89	0.99	5.24	3.27	3.63	39.29
4.534	1297	248.44	0.28449	0.16427	0.09509	0.00446	0.0408	1684	13384	54.7	3.02	1.85	6.79	0.34	1.01	41.69
4.693	1360	249.06	0.28617	0.18159	0.08398	0.00178	0.0435	1689	13415	59.59	3.25	2.18	5.98	0.92	1.98	45.28
4.528	1287	257.65	0.25115	0.10234	0.10295	0.00172	0.04216	1689	13577	47.84	2.6	1.73	6	1.98	0.77	34.76
4.531	1279	262.92	0.34278	0.16135	0.11118	0.00248	0.038	1689	13871	49.68	4.01	2.99	5.02	1.99	0.99	34.68
4.62	1350	257	0.27209	0.12082	0.12547	0.00252	0.04245	1689	13595	53.49	2.43	2.57	5.54	2.99	3.35	36.61
4.6535	1348	255.3	0.26533	0.10398	0.0915	0.00263	0.0444	1689	13217	54.27	2.46	2.34	4.51	3	3.1	38.86
4.585	1315	258.74	0.27903	0.08782	0.10376	0.00276	0.0416	1689	14561	48.67	3.31	2.88	6.6	1.81	3.93	30.14
4.584	1294	261.3	0.26794	0.1551	0.09869	0.00477	0.039	1680	13499	52.41	4	2.01	6.98	2.11	1.55	35.76
4.537	1288	256.3	0.25264	0.10466	0.09425	0.01625	0.03677	1680	13397	48.14	3.17	1.94	6.06	1.98	1.24	33.75
4.536	1373	253.2	0.23544	0.20298	0.10177	0.00409	0.0439	1685	14145	53.71	3.1	1.87	6.68	2	1.93	38.13
4.601	1335	246.75	0.27119	0.1767	0.08209	0.00276	0.042	1680	13397	60.83	3.01	2.18	5.49	2.48	1.84	45.83
4.52	1318	262.64	0.27035	0.17549	0.10244	0.00688	0.045	1690	14635	51.91	4.18	1.99	5.55	2.73	2.59	34.87
4.4105	1255	258.08	0.32241	0.19948	0.12296	0.00311	0.0391	1680	13891	48.91	4.15	1.29	5.29	2.45	0.81	34.92
4.685	1333	261.85	0.24042	0.13859	0.09954	0.00432	0.04136	1685	14070	46.2	2.08	2.85	4.95	1.9	1.98	32.44
4.4315	1300	255.78	0.2596	0.17529	0.10603	0.00382	0.0413	1685	13143	53.26	2.36	1.63	5.46	2.13	0.88	40.8
4.626	1321	248.34	0.40844	0.12706	0.09253	0.00358	0.03704	1685	13612	58.52	3.54	2.47	5.46	2.99	1.32	42.74
4.679	1391	246.71	0.5006	0.10802	0.07504	0.00438	0.0413	1685	13007	67.14	4.53	2.58	6	1.47	4.46	48.1
4.496	1314	242.53	0.28056	0.14176	0.09607	0.00522	0.041	1680	14118	58.52	2.99	3.41	6.49	0.01	0.64	44.98
4.454	1359	262.65	0.36907	0.11863	0.1195	0.00359	0.0374	1685	13878	54.94	3.97	2.99	6.01	1.85	4.05	36.07
4.3255	1278	256.99	0.3554	0.14414	0.1211	0.00363	0.0395	1680	14499	59.56	2.84	2.01	5.49	3.01	0.83	45.38
4.477	1249	260.82	0.19765	0.13188	0.09259	0.00459	0.038	1690	14091	42.66	3.35	2.09	7.05	0.01	0.53	29.63
4.484	1296	256.38	0.3728	0.13715	0.10739	0.00343	0.0394	1689	13520	52.78	3.01	4.2	6.35	0.06	0.52	38.64
4.482	1389	259.8	0.42466	0.10683	0.0476	0.00294	0.03675	1689	13181	50.3	2.51	4.19	6.04	2.09	5.83	29.64
4.686	1333	262.27	0.44421	0.09737	0.09847	0.00334	0.0433	1689	13244	55.91	3.04	2.69	7.82	0.98	4.87	36.51
4.496	1368	253.21	0.31775	0.13266	0.07915	0.00318	0.0402	1689	13321	49.01	3.51	1.65	6	1.99	0.8	35.06
4.428	1300	255.88	0.16241	0.12699	0.10543	0.0013	0.03901	1680	13501	49.61	3.51	1.01	6.39	0.18	0.65	37.87
4.515	1343	250.52	0.44968	0.20742	0.07836	0.00346	0.0392	1680	14086	63.31	4.43	3.5	6.7	1.48	1.66	45.54
4.58	1346	247.69	0.3035	0.09727	0.10174	0.00326	0.03797	1690	13688	49.76	2.51	2.15	5	2.98	2.47	34.65
4.719	1351	249.25	0.21497	0.09864	0.10099	0.0052	0.03787	1685	13237	53.72	3.01	2.19	5.48	1.03	1.69	40.32
4.443	1325	246.88	0.55696	0.15305	0.09476	0.0011	0.0446	1690	13950	57.45	3.85	3.37	6.02	3	1.45	39.76
4.564	1355	243.88	0.39955	0.11921	0.09439	0.00343	0.0359	1685	13620	62.16	2.58	2.52	4.96	3.01	2.97	46.12
4.395	1296	259.91	0.33878	0.14897	0.09436	0.00223	0.0407	1680	13973	50.06	4.11	2.98	6.86	0.02	0.47	35.62
4.44	1332	258.26	0.32316	0.17025	0.10707	0.00281	0.037	1690	14639	49.51	3.35	3.18	7.17	0.24	2.99	32.58
4.64	1341	263.8	0.35233	0.19481	0.07366	0.00419	0.037	1680	14217	52.48	4.14	2.19	6.27	1.34	4.33	34.21
4.4875	1315	252.82	0.19574	0.17311	0.08747	0.00338	0.0414	1680	12996	49.27	3.8	2.13	5.23	2.09	2.05	33.97
4.535	1330	252.64	0.31857	0.14452	0.09722	0.00252	0.0399	1685	13409	54.5	3.5	2.95	5.02	2	0.49	40.54
4.649	1314	242.38	0.4807	0.18843	0.0992	0.00713	0.0364	1680	13787	64.55	3.87	1.99	6.34	2.98	1.95	47.42
4.371	1310	233.06	0.62385	0.18462	0.11234	0.00277	0.0443	1675	14530	67.45	3.96	2.23	6.09	2.97	1.06	51.14
4.602	1298	249.6	0.3341	0.13104	0.11509	0.00291	0.04123	1681	13110	56.83	3.01	3.54	6.89	2	0.63	40.76
4.899	1353	258.82	0.3883	0.20486	0.08374	0.00389	0.0434	1686	13949	57.33	4.27	2.99	6.23	2.31	3.02	38.51
4.467	1331	257.34	0.28161	0.19291	0.09956	0.00344	0.0383	1686	14505	50.05	3.62	3.04	6.07	2.01	2.71	32.6
4.51	1235	250.83	0.24663	0.13057	0.10865	0.00783	0.043	1681	13269	46.58	3.01	1.31	5.5	1.99	0.37	34.4
4.511	1284	264.18	0.19557	0.18049	0.10611	0.00296	0.0443	1686	14479	39.99	3.04	1.35	7.13	2.01	0.75	25.71
4.545	1319	252.8	0.31001	0.10452	0.10455	0.00182	0.0394	1686	12617	42.57	2.02	1.01	4.96	2.88	2.48	29.22
4.517	1332	249.57	0.28865	0.10958	0.09735	0.00293	0.03766	1686	13889	59.25	2.99	1.65	6	2.89	2.49	43.23
4.531	1342	252.45	0.36783	0.19496	0.11761	0.00215	0.0412	1676	13492	52.91	3.23	1.69	8.12	0.01	4.92	34.94
4.6015	1363	243.36	0.39064	0.12021	0.0794	0.00324	0.0366	1686	14051	60.3	2.81	2.38	7.96	0.16	1.49	45.5
4.5565	1269	252.87	0.36409	0.17971	0.13778	0.00246	0.0408	1686	14223	50.27	3.67	1.96	5.93	1.71	3.62	33.38
4.683	1370	241.21	0.36376	0.1234	0.08226	0.00214	0.0412	1686	13998	62.63	3.01	2.02	5.5	1.9	0.49	49.71
4.6265	1350	245.88	0.38064	0.17255	0.11124	0.00438	0.036	1681	14170	58.46	4.95	1.99	5.65	2.99	4.47	38.41
4.611	1350	261.09	0.51625	0.12052	0.10661	0.00458	0.03882	1681	13837	59.04	4.43	2.84	8.22	0.02	5.69	37.84
4.545	1373	248.71	0.51906	0.08702	0.05519	0.00254	0.0407	1681	13935	60.19	2.94	3.05	6.13	2.99	4.88	40.2
4.483	1281	246.84	0.32661	0.14359	0.10517	0.00485	0.03564	1686	13572	52.3	3.99	1.09	6.67	0.05	0.26	40.24
4.5305	1298	260.45	0.41994	0.18089	0.10135	0.00256	0.044	1681	14203	54.91	3.07	2.75	6.09	4.48	3.09	35.43
4.454	1350	251.6	0.27164	0.16687	0.09241	0.002	0.0412	1687	13476	60.34	3.01	2.27	5.49	2.98	1.09	45.5
4.642	1331	250.57	0.24372	0.12927	0.09837	0.00302	0.0388	1687	13551	52.08	1.84	2.05	5.94	1.9	4.04	36.31
4.458	1378	258.85	0.25599	0.1005	0.09242	0.00297	0.044	1687	13270	52.67	2.32	2.92	5.64	1.48	3.37	36.94
4.6345	1340	251.51	0.42751	0.20059	0.09484	0.00326	0.041	1687	13679	60.67	3.3	2.7	5.98	2.9	1.47	44.32
4.577	1373	255.6	0.51266	0.12206	0.0918	0.00327	0.04313	1682	13236	62.41	2.54	3.71	6.44	2.01	2.79	44.92
4.578	1261	255.94	0.34798	0.19159	0.12034	0.00211	0.043	1672	13604	47.38	2.99	3.04	7	0.03	1.31	33.01
4.565	1381	255.67	0.42676	0.13985	0.05902	0.00415	0.03953	1687	13016	58.71	2.64	4	7.46	2.93	3.95	37.73
4.3975	1386	254.71	0.3678	0.14701	0.07974	0.00376	0.041	1687	14394	64.04	4.39	1.6	8.26	3	6.11	40.68
4.549	1359	257.63	0.2937	0.11808	0.12357	0.00213	0.0385	1687	13465	49.41	3.48	2.99	5.49	2.99	5.06	29.4
4.553	1343	253.48	0.27848	0.11816	0.08702	0.00474	0.0448	1682	13121	54.41	2.54	3.21	5.15	2.01	0.31	41.19
4.717	1310	254.55	0.33207	0.20982	0.10629	0.00492	0.0411	1687	14366	53.56	4.42	3.21	5.49	2.98	1.45	36.01
4.494	1307	254.43	0.31371	0.11866	0.11834	0.00173	0.037	1687	13094	49.54	2.4	1.48	6	1.9	2.98	34.78
4.397	1306	258.55	0.20547	0.15568	0.09916	0.00282	0.0422	1687	14337	44.34	2.98	2	5.99	2.09	2.16	29.12
4.607	1327	256.2	0.2674	0.20558	0.0955	0.00244	0.038	1682	14119	57.86	3.32	3.17	5.61	3	1.67	41.09
4.279	1355	259.1	0.25196	0.09514	0.09926	0.00353	0.0409	1687	13394	50.41	3.12	2.16	4.97	2.99	1.67	35.5
4.661	1303	240.77	0.50024	0.15022	0.10289	0.00219	0.0389	1690	13485	60.27	3.07	2.6	5.59	3.17	1.3	44.54
4.546	1339	258.56	0.28719	0.11401	0.116	0.00162	0.04372	1690	14792	50.52	3.05	2.14	6.54	1.89	1.04	35.86
4.409	1270	262	0.22875	0.09788	0.09776	0.00411	0.04309	1690	14288	43.45	3.37	1.7	5.29	3.04	0.23	29.82
4.584	1340	250.02	0.41597	0.17266	0.08318	0.00355	0.0422	1690	13366	57.34	4.48	2.6	6.44	0.93	2.68	40.21
4.54	1322	255.18	0.26381	0.18211	0.10351	0.00229	0.0392	1685	13764	51.68	3.48	2.31	7	0.03	3.76	35.1
4.615	1258	257.34	0.34072	0.08502	0.09752	0.00104	0.0374	1690	13959	44.09	3.58	2.93	6.67	0.26	0.62	30.03
4.539	1387	253.85	0.26907	0.18759	0.103	0.00392	0.0381	1690	13363	57.56	3.17	3.07	5.02	1.84	4.7	39.76
4.401	1331	253.56	0.42679	0.11598	0.10767	0.00506	0.035	1690	14382	51.55	3.78	4.18	5.02	3.05	1.43	34.09
4.566	1339	260.7	0.29945	0.14842	0.07514	0.00328	0.0416	1687	13490	51.7	2.97	1.98	4.98	2.98	3.55	35.24
4.572	1311	255.42	0.43994	0.13879	0.14301	0.00378	0.03873	1687	13619	55.57	3	3.25	5.95	2.9	1.12	39.35
4.569	1318	253.77	0.23076	0.12164	0.09159	0.00276	0.03867	1687	13605	48.6	2.82	1.96	5.02	1.9	1.1	35.8
4.43	1378	254.73	0.38834	0.14307	0.11563	0.00281	0.0412	1687	13225	51.04	3.05	2.98	8.01	0.02	6.9	30.08
4.593	1365	252.65	0.28491	0.18185	0.07892	0.00286	0.037	1682	13696	62.07	3.03	2.12	6.49	2.14	3.54	44.75
4.462	1345	253.49	0.38024	0.17854	0.11468	0.00147	0.0412	1687	14072	62.15	4.02	3.01	6.01	0.97	3.68	44.46
4.585	1317	247.15	0.38083	0.13129	0.09482	0.0021	0.0389	1682	13585	59.23	3.33	1.65	6.5	1.62	2.32	43.81
4.514	1311	249.44	0.33591	0.18171	0.09873	0.0036	0.038	1687	13715	49.47	3.33	2.72	5.01	1.98	1.82	34.61
4.346	1351	252.59	0.30904	0.24053	0.08716	0.00329	0.044	1682	13690	56.34	4.02	1.95	7.28	0.04	2.04	41.01
4.477	1284	250.68	0.31507	0.1576	0.10298	0.00377	0.0392	1682	13708	52.21	4.07	2	6	3	1.98	35.16
4.542	1316	258.31	0.31224	0.11974	0.09371	0.00301	0.0432	1687	14049	55.42	2.29	3.02	4.96	4.17	2.03	38.95
4.579	1300	246.68	0.4079	0.13395	0.10084	0.00277	0.0363	1687	13829	56.49	2.52	3.52	5.97	3.03	0.79	40.66
4.494	1303	254.53	0.51241	0.16553	0.13432	0.00152	0.0358	1682	14793	55.55	4.46	2.02	5	2.9	1.61	39.56
4.619	1283	254.67	0.21704	0.17292	0.09352	0.00473	0.0426	1683	13381	48.95	3.91	0.5	5.98	2.81	0.77	34.98
4.498	1323	239.71	0.38289	0.1717	0.12042	0.00212	0.042	1683	14441	56.81	3.85	1.98	5.47	3.02	2.01	40.48
4.233	1314	250.96	0.35315	0.20956	0.08848	0.00348	0.0368	1683	14072	55.34	3.99	2.38	5.98	2.99	1.26	38.74
4.392	1320	254.71	0.41389	0.11532	0.10373	0.00158	0.042	1688	12955	47.54	2.54	3.74	6.05	2.02	3.01	30.18
4.413	1335	254.83	0.27975	0.19035	0.08703	0.00398	0.0443	1688	14412	56.16	4.03	3.37	6.52	1.17	0.97	40.1
4.4855	1304	250.63	0.24678	0.13907	0.10724	0.00397	0.045	1683	13142	54.1	3.07	0.8	5.04	2.94	0.56	41.69
4.479	1354	250.55	0.43096	0.12393	0.11605	0.00232	0.041	1683	13119	55.39	3.48	2.83	6.01	2.99	5	35.08
4.512	1320	254.87	0.35676	0.2138	0.09739	0.00783	0.038	1683	13702	48.87	4.17	3.84	5.5	1.98	3.38	30
4.633	1376	258.22	0.4739	0.20105	0.0868	0.00276	0.04052	1688	13746	60.91	3.03	4.29	6.1	1.22	5.28	40.99
4.605	1352	250.55	0.46617	0.20227	0.12818	0.00285	0.0363	1683	13156	59.09	5.01	1.74	4.92	2.97	3.19	41.26
4.324	1334	242.09	0.29511	0.10737	0.09807	0.00366	0.0426	1673	13283	60.76	2.48	2.64	6.02	3.02	1.06	45.54
4.497	1328	251.19	0.39989	0.12262	0.04921	0.00702	0.045	1683	13916	60.04	2.61	2.74	5.29	3.32	1.32	44.76
4.596	1336	261.97	0.35943	0.16985	0.10197	0.00412	0.0437	1688	13414	52.62	3.21	2.17	5.97	2.98	3.72	34.57
4.6375	1287	253.9	0.43511	0.14311	0.10671	0.00469	0.0419	1683	13835	61.12	3.83	2.37	5.02	2.8	1.47	45.63
4.514	1290	251.66	0.35346	0.13642	0.11521	0.00635	0.043	1683	14033	49.99	2.78	2.97	7.44	0.06	4.2	32.54
4.604	1341	248.56	0.3903	0.17149	0.10268	0.00267	0.0388	1688	13739	57.24	3.57	2	5.06	3	1.99	41.62
4.5	1353	244.13	0.42575	0.1408	0.0951	0.00364	0.0434	1683	13066	57.82	3.49	3.33	6.81	0.63	3.04	40.52
4.657	1346	260.64	0.35669	0.10796	0.11027	0.00289	0.03872	1688	13842	52.72	3.55	2.48	4.99	3	3.69	35.01
4.524	1308	255.14	0.31345	0.16985	0.10827	0.00471	0.0391	1683	13892	48.87	3.71	2.47	7.58	0.06	1.48	33.57
4.61	1363	249.96	0.40375	0.17338	0.09541	0.00288	0.0408	1673	13840	58.03	3.7	2.09	5.49	2.97	4.76	39.02
4.364	1339	258.37	0.57942	0.14792	0.08495	0.00151	0.03839	1683	13538	58.44	2.81	3.94	6.46	2.81	1.93	40.49
4.531	1353	247.86	0.27777	0.13911	0.08506	0.00311	0.036	1688	13649	59.92	2.98	1.99	5.02	2.97	1.06	45.9
4.5035	1346	246.64	0.22997	0.1092	0.09345	0.005	0.03933	1688	12692	52.33	2.54	2.66	5.09	1.09	1.42	39.53
4.566	1315	243.48	0.36571	0.15727	0.10302	0.00395	0.045	1683	13330	56.29	4.08	2.93	6.93	0.11	1.99	40.25
4.39	1290	253.88	0.39165	0.22911	0.11245	0.00422	0.0378	1688	14724	50.09	5.05	2.35	6.17	2.18	1.72	32.62
4.578	1315	255.37	0.46363	0.13548	0.10618	0.00239	0.04157	1683	13531	48.66	3.41	2.02	5.49	1.9	1.09	34.75
4.328	1330	248.21	0.42279	0.21095	0.11439	0.00155	0.0397	1688	14353	60.31	4.43	2.39	6.57	3.01	0.57	43.34
4.22	1332	245.52	0.44218	0.21309	0.10676	0.00201	0.0384	1683	13854	60.59	3.72	1.93	5.59	2.38	0.96	46.01
4.633	1355	250.05	0.36832	0.10952	0.09993	0.0111	0.044	1684	12693	55.64	2.97	2	4.75	2.93	3.27	39.72
4.6145	1322	246.41	0.32958	0.11046	0.09148	0.00272	0.04352	1677	13412	60.06	2.99	1.98	5.49	2.98	1.43	45.19
4.6095	1389	261.52	0.4127	0.12766	0.07214	0.00327	0.04	1684	13444	55.43	3.31	4.4	6.58	0.61	5.56	34.97
4.341	1327	262.84	0.15418	0.15029	0.10476	0.00382	0.0361	1689	14400	43.4	3.27	2.53	5.94	1.9	1.56	28.2
4.569	1362	251.35	0.37618	0.14324	0.09583	0.00216	0.0435	1684	13906	63.95	3.97	2.01	6.46	2.99	3	45.52
4.598	1340	255.91	0.36219	0.1116	0.09716	0.00195	0.0372	1677	13295	55.51	4.09	3.01	5.64	1.99	3.5	37.28
4.507	1368	247.63	0.47619	0.15208	0.10532	0.00132	0.04355	1684	13240	60.27	3.48	3.39	6.39	1.61	6.38	39.02
4.5005	1268	249.09	0.29501	0.15073	0.09768	0.00488	0.0418	1689	13992	52.9	3.71	1.91	7.25	0.03	1.41	38.59
4.381	1330	249.36	0.59405	0.23437	0.10297	0.00543	0.045	1684	13344	57.84	4.28	2.36	4.99	3	5.72	37.49
4.766	1344	252.96	0.38223	0.12527	0.10991	0.00419	0.04304	1681	13557	59.74	2.48	3.16	6.67	0.1	3	44.33
4.967	1351	247.62	0.3703	0.15926	0.10196	0.00261	0.0351	1684	14256	56.82	4.46	2.06	6.25	2.9	2.53	38.62
4.4105	1257	243.55	0.33997	0.11615	0.10331	0.00513	0.04099	1690	13369	52.29	3.21	1.29	5.21	1.99	0.35	40.24
4.523	1328	248.84	0.34742	0.12703	0.09483	0.00776	0.0438	1685	13190	55.97	3.77	2	5.88	2.97	1.31	40.04
4.537	1336	252.11	0.36658	0.13612	0.09478	0.00187	0.03971	1685	13661	57.77	3.23	3.45	5.05	3.03	2.07	40.94
4.565	1306	242.79	0.30263	0.1166	0.11159	0.00285	0.04315	1690	13707	57.26	2.59	2.16	4.97	3.93	0.54	43.07
4.607	1366	257.17	0.16489	0.09113	0.10227	0.00346	0.0446	1685	13366	50.17	2.48	2.53	5.04	3	2.01	35.11
4.458	1345	246.44	0.40534	0.12734	0.08862	0.00537	0.0425	1675	14066	59.45	3.42	2.11	5.49	2.99	3.37	42.07
4.539	1337	247.18	0.2452	0.13043	0.11094	0.0027	0.04421	1685	13303	58.51	3.33	1.98	5.02	1.98	1.12	45.08
4.65	1289	257.39	0.44967	0.11783	0.11755	0.00254	0.0377	1682	14500	47.45	4.13	4.18	5.06	3.09	1.57	29.42
4.455	1274	250.99	0.43134	0.13183	0.09823	0.00191	0.0425	1677	13477	59.02	3.8	1.35	5.48	2.93	0.53	44.93
4.6295	1349	265.71	0.38883	0.17353	0.10418	0.00889	0.0364	1687	14386	52.6	3.8	4.14	5.57	3	3.82	32.27
4.445	1310	244.39	0.43787	0.1507	0.09694	0.00607	0.0405	1685	13987	65.79	2.52	3.55	7.02	0.05	1.23	51.42
4.444	1340	246.69	0.50129	0.18358	0.09985	0.00446	0.035	1685	14520	64.94	4.37	3.26	6.04	3.05	1.39	46.83
4.6035	1296	251	0.46094	0.18595	0.09272	0.00612	0.0398	1675	13928	58.03	3.95	2.02	5.48	3.02	3.76	39.8
4.238	1289	230.75	0.62791	0.21473	0.13008	0.00234	0.037	1685	14748	67.24	4.85	1.99	6.46	2.98	0.84	50.12
4.548	1302	259.74	0.24268	0.13146	0.11742	0.0036	0.0358	1676	13574	49.23	3.14	0.99	5.43	3.07	0.72	35.88
4.438	1314	245.19	0.38816	0.18932	0.09479	0.0026	0.038	1686	13513	54.97	3.65	0.73	5.85	3.04	0.47	41.23
4.46	1239	253.66	0.25961	0.08539	0.10001	0.00151	0.0441	1681	13668	39.47	3.03	2.05	5.96	1.9	1.16	25.37
4.685	1370	243.83	0.50108	0.20306	0.06302	0.00331	0.0402	1676	14069	64.04	4.62	3.64	7.19	0.07	1.27	47.25
4.5585	1314	248.61	0.26877	0.16677	0.09802	0.00455	0.042	1681	13281	52.78	3.3	2.22	5	1.99	0.46	39.81
4.574	1310	252.56	0.27962	0.17316	0.08542	0.00311	0.041	1686	13097	49.19	3.55	2.93	6.62	0.09	0.74	35.26
4.463	1309	260.21	0.33408	0.17699	0.10114	0.00856	0.042	1684	13817	51.97	3.87	3.03	5.96	0.42	2.52	36.17
4.683	1312	252.26	0.42727	0.18704	0.08572	0.00255	0.044	1690	13491	59.67	3.97	1.46	6.04	2.34	2.78	43.08
4.4575	1294	249.25	0.40777	0.15463	0.10925	0.00222	0.037	1684	14009	54.58	3.38	2.9	6.12	2.96	1.76	37.46
4.5025	1290	254.57	0.28819	0.12234	0.10299	0.00385	0.03765	1676	14373	54.69	2.7	2.12	4.98	1.9	1.63	41.36
4.5765	1294	252.05	0.3768	0.13893	0.10672	0.00525	0.03619	1681	13909	49.94	2.36	2.96	5.44	1.9	0.49	36.79
4.597	1360	258.76	0.41219	0.15213	0.09193	0.00453	0.0408	1676	14385	49.71	2.76	3.06	7.22	1.58	0.54	34.55
4.5605	1386	246.55	0.39619	0.18734	0.0787	0.00493	0.0436	1686	13625	58.29	4.05	2.02	6.03	2.02	6.48	37.69
4.494	1327	254.17	0.25905	0.14764	0.09985	0.00402	0.0442	1682	14469	55.26	4.28	2.22	6.98	0.01	0.67	41.1
4.4875	1324	244.49	0.51657	0.16664	0.09469	0.00145	0.04186	1677	13406	61.57	3.16	3.01	5.98	2.99	2.43	44
4.5235	1304	247.77	0.22374	0.13392	0.09684	0.00185	0.04	1687	14060	53.12	3.54	2.07	5	3.06	0.66	38.79
4.686	1320	245.34	0.44911	0.26215	0.10187	0.00366	0.0374	1682	14080	61.08	4.88	1.95	6.1	2.99	0.96	44.2
4.6115	1314	253.89	0.3659	0.18191	0.12281	0.00248	0.0436	1677	14552	57.13	4.07	2.1	5.98	3.12	3.62	38.24
4.584	1319	255.11	0.28756	0.20123	0.08597	0.00455	0.0382	1682	14402	55.03	4.01	3	4.97	1.88	0.47	40.7
4.298	1325	235.99	0.36231	0.17827	0.1003	0.00253	0.0365	1684	13285	58.51	3.97	1.97	4.96	3.02	0.49	44.1
4.374	1232	256.2	0.41484	0.17308	0.09535	0.00219	0.0379	1689	13639	49.19	3.38	1.37	7.49	0.66	1.99	34.3
4.8505	1347	243.25	0.35597	0.12436	0.08359	0.00468	0.042	1677	13338	59.63	3.12	2.5	5.86	0.37	0.57	47.21
